# Supplementary material
Source: publisher figshare collection journal article supplement (https://frontiersin.figshare.com/ndownloader/files/16694129)
Supplement: Supplementary file [file 16694129]

## Supplementary Materials

### **Rapid Nanopore Assay for Carbapenem-resistant *Klebsiella Pneumoniae***

Haofu Niu<sup>1,2†</sup>, Weili Zhang<sup>1†</sup>, Liangwan Wei<sup>2†</sup>, Meng Liu<sup>2</sup>, Hao Liu<sup>2</sup>, Changjian Zhao<sup>1</sup>,  
Peng Zhang<sup>1</sup>, Quanfeng Liao<sup>1</sup>, Ya Liu<sup>1</sup>, Qingyue Yuan<sup>1</sup>, Siying Wu<sup>1</sup>, Mei Kang<sup>1\*</sup>, Jia  
Geng<sup>1\*</sup>

<sup>1</sup> *Department of Laboratory Medicine, State Key Laboratory of Biotherapy and Cancer Center, West  
China Hospital, Sichuan University and Collaborative Innovation Center, Chengdu 610041 China*

<sup>2</sup> *Department of Microbiology, West China School of Basic Medical Sciences & Forensic Medicine,  
Sichuan University, Chengdu 610041 China*

*\*Correspondence:*

*Mei Kang*

*[kangmei@sina.com](mailto:kangmei@sina.com)*

*Jia Geng*

*[geng.jia@scu.edu.cn](mailto:geng.jia@scu.edu.cn)*

*†These authors have contributed equally to this work.*

## **Expression and purification of MspA nanopore**

BL21 Competent *E. coli* is a widely used strain and is suitable for transformation and protein expression. The gene of MspA nanopore was cloned into the pET-28b plasmid, and the pET-28b plasmid carried with MspA gene was transferred into engineering bacteria *E. coli* BL21 (Niederweis et al., 1999). Successfully transferred *E. coli* was cultured in the LB media at 37°C, and the kanamycin was added to 50 µg/mL. While the optical density (600 nm) was close to 0.8, the 0.8 mM IPTG was added into the LB (lysogeny broth) media with an inducing temperature of 15°C. After 12h of induction, the *E. coli* was collected through centrifugation. The supernatant was collected after the *E. coli* was broken by the ultrasonicator, and further purified by anion-exchange column (Q-Sepharose) and molecular sieve (Superdex 200 16/90). The purified protein was analyzed by 10% SDS-PAGE (Sodium dodecyl sulfate polyacrylamide gel electrophoresis).

The purified MspA nanopore protein can be aliquoted and stored at – 80 °C. The aliquots remain stable for years, and the nanopore remains active upon thaw (Haque et al., 2013).

## **Probe design**

We design probes to combine with specific fragments of 16S rRNA, so that we can recognize specific signals regarding the target nucleic acid through nanopore. Since the target 16S rRNA has a long length of 932 bp, it is difficult to distinguish the 16S rRNA-probe complex without probes or by a single probe, thus two probes were designed to bind the specifically expressed 16S rRNA of KP (**Figure 2A**). Probe A bound to the conserved area of 16S rRNA (810 nt-937 nt) was used to help the 16S rRNA-probe complex keep consistent secondary structure and increase dwell time which can be distinguished easily by MspA ; Probe B bound to the specific area of 16S rRNA (10 nt-136 nt) has been reported to be 100% specific and we used it to increase the specificity (Poh et al., 2004).

## REFERENCES

- Niederweis, M., Ehrt, S., Heinz, C., Klöcker, U., Karosi, S., Swiderek, K. M., et al. (1999). Cloning of the mspA gene encoding a porin from Mycobacterium smegmatis. *Mol. Microbiol.* 33, 933–945. doi:10.1046/j.1365-2958.1999.01472.x.
- Poh, C. L., Kurupati, P., Chow, C., and Kumarasinghe, G. (2004). Rapid Detection of Klebsiella pneumoniae from Blood Culture Bottles by Real-Time PCR. *J. Clin. Microbiol.* 42, 8–12. doi:10.1128/JCM.42.3.1337.

**Table S1. Clinical sample information of CRKP.** The Sample ID is the patient ID in hospital and the Sample number is the corresponding number in our study.

| Sample ID  | Sample # | SCIM (mm) | Drug resistance gene | Drug resistance gene |
|------------|----------|-----------|----------------------|----------------------|
| 17012889-3 | 1        | 6         | KPC                  | KPC-2                |
| 17019349-3 | 3        | 6         | KPC                  | KPC-2                |
| 1810143046 | 4        | 6         | KPC                  | KPC-2                |
| 15043287-1 | 5        | 6         | KPC                  | KPC-2                |
| 15057156-1 | 6        | 6         | KPC                  | KPC-2                |
| 15083593-1 | 7        | 6         | KPC                  | KPC-2                |
| 1807191036 | 8        | 6         | KPC                  | KPC-2                |
| 1807271015 | 9        | 24        | Negative             | -                    |
| 17008404-1 | 11       | 6         | KPC                  | None                 |
| 17012837-3 | 12       | 6         | KPC                  | KPC-2                |
| 17020362-3 | 20       | 6         | KPC                  | KPC-2                |

**Table S2. Clinical sample information of CSKP.** The Sample ID is the patient ID in hospital and the Sample number is the corresponding number in our study.

| Sample ID  | Sample # | Detected bacteria | Drug-resistant form | SCIM-IPM (mm) |
|------------|----------|-------------------|---------------------|---------------|
| 1809163029 | 2        | CSKP              | ESBL                | 34            |
| 1807171076 | 10       | CSKP              | ESBL                | 33            |
| 1807163074 | 13       | CSKP              | -                   | -             |
| 1806163019 | 14       | CSKP              | -                   | -             |
| 1807043013 | 15       | CSKP              | ESBL                | 33            |
| 1806301100 | 16       | CSKP              | ESBL                | 34            |
| 1806133062 | 17       | CSKP              | -                   | -             |
| 1806083069 | 18       | CSKP              | ESBL                | 32            |
| 1806163021 | 19       | CSKP              | ESBL                | 31            |

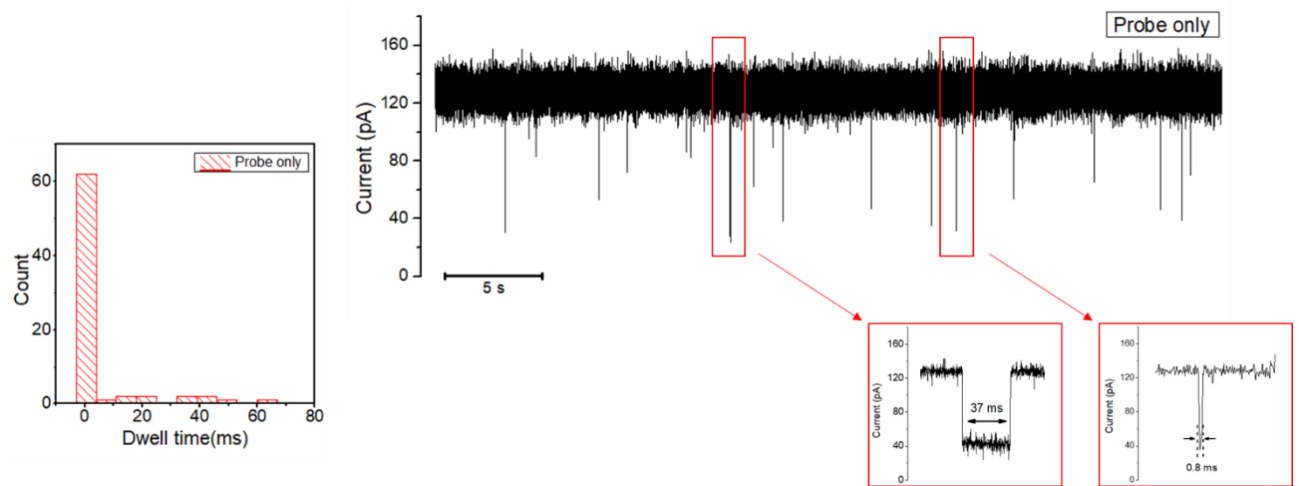

**Figure S1. Translocation signal of probe only group.** The dwell time of the DNA probe translocation through nanopore is in the range of 0 to 70 ms.

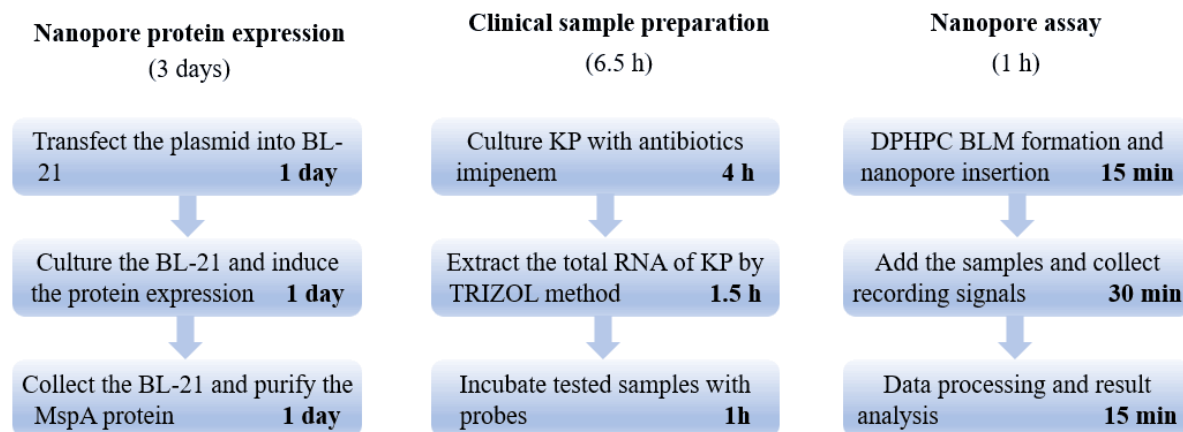

**Figure S2. Flow chart of the experiment and time cost in total.** The MspA protein is stored in the refrigerator at -80°C for use after expression and purification for further test. There is no need to prepare the nanopore for each experiment.
